# Supplementary material
Source: HighWire-hosted journal article supplement (https://rapm.bmj.com/content/45/12/943)
Supplement: inline-supplementary-material-1 [file inline-supplementary-material-1.pdf]

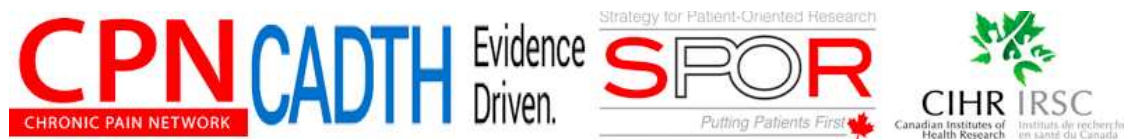

You are invited to participate in a **panCanadian survey about multidisciplinary pain treatment clinics** which is being conducted by the Registry Working Group of the CIHR - SPOR Canadian Chronic Pain Network in collaboration with the Canadian Agency for Drugs and Technologies in Health (CADTH). A multidisciplinary pain treatment clinic is defined as “*a health care delivery facility staffed with health care professionals who are specialized in the diagnosis and management of patients with chronic pain.*” (*International Association for the Study of Pain, 1990*)<sup>1</sup>

This questionnaire should take 30 minutes to complete, and will be very helpful in providing us with a comprehensive picture of your pain clinic. You can fill out part of the questionnaire and return to it later on.

By responding to all questions of this survey, you consent that the contact information of your clinic along with a summarized version of the information collected will be posted on the SPOR Chronic Pain Network website.

***We would gratefully value survey completion by XXX. A reminder will be sent two weeks prior to this deadline date.***

Many thanks advance for taking your time to answer our questionnaire.

---

<sup>1</sup> Task Force on Guidelines for Desirable Characteristics for Pain Treatment Facilities. *Desirable Characteristics for Pain Treatment Facilities*, IASP, 1990. Retrieved from: <http://www.iasp-pain.org/Education/Content.aspx?ItemNumber=1471>

## MULTIDISCIPLINARY PAIN TREATMENT CLINICS Online Survey

### PAIN CLINIC INFORMATION

---

#### 1. Clinic identification:

Name \_\_\_\_\_

Medical Director's name \_\_\_\_\_

Address \_\_\_\_\_

Phone number (\_\_\_\_) \_\_\_\_\_

Fax number (\_\_\_\_) \_\_\_\_\_

E-mail address \_\_\_\_\_

Website URL, if applies \_\_\_\_\_

#### 2. Contact information:

Person who  
fills out this  
questionnaire, if  
different than the  
Medical Director

Name \_\_\_\_\_

Position \_\_\_\_\_

Phone number (\_\_\_\_) \_\_\_\_\_

E-mail address \_\_\_\_\_

#### 3. Does your clinic describe itself as a pain clinic or a pain centre and/or advertize as specialized multidisciplinary services for diagnosis and management of patients with chronic pain?

Yes → Please go to the next question

No → Thank you for your collaboration and for having taken the time to answer this questionnaire

4. Does your clinic have a minimum of three different health care disciplines (whose services are available and integrated within your pain clinic or centre) including at least one medical specialty (e.g., anesthesiology, psychology, physiotherapy)?
- Yes → Please go to the next question
- No → Thank you for your collaboration and for having taken the time to answer this questionnaire
5. Where is your clinic located?  
*Please tick the box that applies*
- Hospital
- Rehabilitation centre
- Free standing clinic
- 5.1 Is your clinic university-affiliated?
- Yes
- No

## CLINICAL ACTIVITIES

---

### General volume

6. Number of weeks per year that your pain clinic operates \_\_\_\_\_
7. Total number of new consultations the last 12 months \_\_\_\_\_
8. Total number of follow-up visits the last 12 months (including medical visits, physiotherapy sessions, psychotherapy counselling, etc.) \_\_\_\_\_
9. Total number of patients waiting to be evaluated and treated in your clinic \_\_\_\_\_
10. Average wait time for:
- 10.1 a 1<sup>st</sup> visit in number of weeks to obtain an appointment at your clinic \_\_\_\_\_
- 10.2 a 1<sup>st</sup> consultation with a nurse and/or a other non physician healthcare professional(s) for patient education \_\_\_\_\_
- 10.3 a 1<sup>st</sup> consultation with a physician with or without other healthcare professional(s) \_\_\_\_\_

11. Do you treat only one type of pain syndrome in your clinic?

Yes → *If yes, please specify the pain syndrome treated* \_\_\_\_\_

No → *If no, go to question 11.1*

11.1 Please estimate the three (3) chronic pain syndromes most frequently treated in your pain clinic

| Chronic pain syndromes                                                                                         | <i>1<sup>st</sup> most frequent</i> | <i>2<sup>nd</sup> most frequent</i> | <i>3<sup>rd</sup> most frequent</i> |
|----------------------------------------------------------------------------------------------------------------|-------------------------------------|-------------------------------------|-------------------------------------|
| Low back pain                                                                                                  | <input type="checkbox"/>            | <input type="checkbox"/>            | <input type="checkbox"/>            |
| Neck pain                                                                                                      | <input type="checkbox"/>            | <input type="checkbox"/>            | <input type="checkbox"/>            |
| Headache/migraine                                                                                              | <input type="checkbox"/>            | <input type="checkbox"/>            | <input type="checkbox"/>            |
| Postherpetic neuralgia                                                                                         | <input type="checkbox"/>            | <input type="checkbox"/>            | <input type="checkbox"/>            |
| Neuropathic pain<br>(excluding low back pain<br>or neck pain)                                                  | <input type="checkbox"/>            | <input type="checkbox"/>            | <input type="checkbox"/>            |
| Fibromyalgia                                                                                                   | <input type="checkbox"/>            | <input type="checkbox"/>            | <input type="checkbox"/>            |
| Osteoarthritis                                                                                                 | <input type="checkbox"/>            | <input type="checkbox"/>            | <input type="checkbox"/>            |
| Rheumatoid arthritis                                                                                           | <input type="checkbox"/>            | <input type="checkbox"/>            | <input type="checkbox"/>            |
| Other types of arthritis                                                                                       | <input type="checkbox"/>            | <input type="checkbox"/>            | <input type="checkbox"/>            |
| CRPS (chronic regional<br>pain syndrome)                                                                       | <input type="checkbox"/>            | <input type="checkbox"/>            | <input type="checkbox"/>            |
| Pelvic pain                                                                                                    | <input type="checkbox"/>            | <input type="checkbox"/>            | <input type="checkbox"/>            |
| Cancer pain syndromes                                                                                          | <input type="checkbox"/>            | <input type="checkbox"/>            | <input type="checkbox"/>            |
| Craniofacial pain                                                                                              | <input type="checkbox"/>            | <input type="checkbox"/>            | <input type="checkbox"/>            |
| Other (specify and indicate if<br>1 <sup>st</sup> , 2 <sup>nd</sup> or 3 <sup>rd</sup> most frequent)<br>_____ | <input type="checkbox"/>            | <input type="checkbox"/>            | <input type="checkbox"/>            |
| Other (specify and indicate if<br>1 <sup>st</sup> , 2 <sup>nd</sup> or 3 <sup>rd</sup> most frequent)<br>_____ | <input type="checkbox"/>            | <input type="checkbox"/>            | <input type="checkbox"/>            |
| Other (specify and indicate if<br>1 <sup>st</sup> , 2 <sup>nd</sup> or 3 <sup>rd</sup> most frequent)<br>_____ | <input type="checkbox"/>            | <input type="checkbox"/>            | <input type="checkbox"/>            |

12. Does your clinic hold regular multidisciplinary meetings to discuss clinical cases (assessment and/or management)?  
*Please specify the number in weeks or months*
- Yes → *If yes, at what frequency?* \_\_\_\_\_/weeks or \_\_\_\_\_/months
- No
- 12.1 Please indicate the percentage of your patients who are assessed by more than one healthcare professional at the same time (e.g., physician and psychologist)? \_\_\_\_\_%

## TREATMENT MODALITIES

---

<sup>(2)</sup>  
*Please indicate all treatment modalities offered within your pain clinic*

### Pharmacological modalities

13. Do you provide pharmacologic therapy in your facility?
- Yes
- No
14. Do you prescribe opioids in your clinic?
- Yes → *If yes, please indicate the use of a patient opioid contract agreement for opioid prescriptions*
- Systematically with all patients
- With the majority of patients
- In specific cases only
- No
15. Do you use urine-screening tests for patients on opioids?
- Yes → *If yes, please indicate the frequency of urine tests for patients on opioids*
- Systematically with all patients
- With the majority of patients
- In specific cases only
- No
16. Do you offer infusion therapy?
- Yes → *If yes, which type(s) of infusion therapy do you use?*
- Lidocaine
- Ketamine
- Phosphonate
- Other (specify) \_\_\_\_\_
- No
17. Does your clinic assist patients in obtaining approval for medical marijuana?
- Yes
- No

18. Do you prescribe medical marijuana to patients in your clinic?

- Yes  
 No

### **Intervention modalities**

19. Do you provide interventional procedures in your clinic?

- Yes → *If yes, which of these imaging modalities for injection do you use?*  
 Fluoroscopy     Ultrasound     No imaging equipment  
 No

19.1 Which of these procedures are performed within your clinic?

*Please tick the appropriate boxes and indicate whether the following performed procedures are publicly funded or not*

| Performed procedures                                                   | Yes                      | No                       |
|------------------------------------------------------------------------|--------------------------|--------------------------|
| <input type="checkbox"/> Trigger point injection                       | <input type="checkbox"/> | <input type="checkbox"/> |
| <input type="checkbox"/> Deep muscle/soft tissue injection             | <input type="checkbox"/> | <input type="checkbox"/> |
| <input type="checkbox"/> Joint injection                               | <input type="checkbox"/> | <input type="checkbox"/> |
| <input type="checkbox"/> Epidural steroid injection (image guided)     | <input type="checkbox"/> | <input type="checkbox"/> |
| <input type="checkbox"/> Epidural steroid injection (non-image guided) | <input type="checkbox"/> | <input type="checkbox"/> |
| <input type="checkbox"/> Transforaminal injection                      | <input type="checkbox"/> | <input type="checkbox"/> |
| <input type="checkbox"/> Caudal injection                              | <input type="checkbox"/> | <input type="checkbox"/> |
| <input type="checkbox"/> Facet injection (image guided)                | <input type="checkbox"/> | <input type="checkbox"/> |
| <input type="checkbox"/> Facet injection (non-image guided)            | <input type="checkbox"/> | <input type="checkbox"/> |
| <input type="checkbox"/> Vertebroplasty                                | <input type="checkbox"/> | <input type="checkbox"/> |
| <input type="checkbox"/> Epiduroscopy                                  | <input type="checkbox"/> | <input type="checkbox"/> |
| <input type="checkbox"/> Botulinum toxin injection                     | <input type="checkbox"/> | <input type="checkbox"/> |
| <input type="checkbox"/> Radiofrequency ablation for spine             | <input type="checkbox"/> | <input type="checkbox"/> |
| <input type="checkbox"/> Radiofrequency ablation for large joint       | <input type="checkbox"/> | <input type="checkbox"/> |
| <input type="checkbox"/> Radiofrequency ablation for peripheral nerve  | <input type="checkbox"/> | <input type="checkbox"/> |
| <input type="checkbox"/> Sympathetic block upper trunk                 | <input type="checkbox"/> | <input type="checkbox"/> |
| <input type="checkbox"/> Sympathetic block lower trunk                 | <input type="checkbox"/> | <input type="checkbox"/> |
| <input type="checkbox"/> Sympathetic neurolysis                        | <input type="checkbox"/> | <input type="checkbox"/> |
| <input type="checkbox"/> Intravenous regional anesthesia               | <input type="checkbox"/> | <input type="checkbox"/> |
| <input type="checkbox"/> Peripheral nerve block                        | <input type="checkbox"/> | <input type="checkbox"/> |
| <input type="checkbox"/> Spinal cord stimulation                       | <input type="checkbox"/> | <input type="checkbox"/> |
| <input type="checkbox"/> Intrathecal pump                              | <input type="checkbox"/> | <input type="checkbox"/> |
| <input type="checkbox"/> Cryotherapy                                   | <input type="checkbox"/> | <input type="checkbox"/> |
| <input type="checkbox"/> Other (specify) _____                         | <input type="checkbox"/> | <input type="checkbox"/> |

**Physical/cognitive behavioral/psychological modalities**

20. Which of these treatment modalities are provided within your clinic?

*Please tick the appropriate boxes and indicate whether the following treatment modalities are publicly funded or not*

| Treatment modalities                                           | Yes                      | No                       |
|----------------------------------------------------------------|--------------------------|--------------------------|
| <input type="checkbox"/> Intramuscular stimulation             | <input type="checkbox"/> | <input type="checkbox"/> |
| <input type="checkbox"/> Electrical stimulation (TENS)         | <input type="checkbox"/> | <input type="checkbox"/> |
| <input type="checkbox"/> Acupuncture                           | <input type="checkbox"/> | <input type="checkbox"/> |
| <input type="checkbox"/> Hydrotherapy                          | <input type="checkbox"/> | <input type="checkbox"/> |
| <input type="checkbox"/> Massage                               | <input type="checkbox"/> | <input type="checkbox"/> |
| <input type="checkbox"/> Pelvic floor therapy                  | <input type="checkbox"/> | <input type="checkbox"/> |
| <input type="checkbox"/> Therapeutic touch                     | <input type="checkbox"/> | <input type="checkbox"/> |
| <input type="checkbox"/> Group exercise program                | <input type="checkbox"/> | <input type="checkbox"/> |
| <input type="checkbox"/> Biofeedback                           | <input type="checkbox"/> | <input type="checkbox"/> |
| <input type="checkbox"/> Graded motor imagery (mirror therapy) | <input type="checkbox"/> | <input type="checkbox"/> |
| <input type="checkbox"/> Active Release Technique (ART)        | <input type="checkbox"/> | <input type="checkbox"/> |
| <input type="checkbox"/> Occupational therapy                  | <input type="checkbox"/> | <input type="checkbox"/> |
| <input type="checkbox"/> Recreational therapy                  | <input type="checkbox"/> | <input type="checkbox"/> |
| <input type="checkbox"/> Pharmacy counseling                   | <input type="checkbox"/> | <input type="checkbox"/> |
| <input type="checkbox"/> Nutrition counseling                  | <input type="checkbox"/> | <input type="checkbox"/> |
| <input type="checkbox"/> Sex therapy                           | <input type="checkbox"/> | <input type="checkbox"/> |
| <input type="checkbox"/> Hypnosis                              | <input type="checkbox"/> | <input type="checkbox"/> |
| <input type="checkbox"/> Cognitive behavioral therapy          | <input type="checkbox"/> | <input type="checkbox"/> |
| <input type="checkbox"/> Dialectical behavior therapy          | <input type="checkbox"/> | <input type="checkbox"/> |
| <input type="checkbox"/> Mindfulness stress reduction program  | <input type="checkbox"/> | <input type="checkbox"/> |
| <input type="checkbox"/> Self-management program               | <input type="checkbox"/> | <input type="checkbox"/> |
| <input type="checkbox"/> Group education                       | <input type="checkbox"/> | <input type="checkbox"/> |
| <input type="checkbox"/> Relaxation /breathing techniques      | <input type="checkbox"/> | <input type="checkbox"/> |
| <input type="checkbox"/> Individual psychotherapy              | <input type="checkbox"/> | <input type="checkbox"/> |
| <input type="checkbox"/> Group psychotherapy                   | <input type="checkbox"/> | <input type="checkbox"/> |
| <input type="checkbox"/> Family/couple therapy                 | <input type="checkbox"/> | <input type="checkbox"/> |
| <input type="checkbox"/> Other (specify) _____                 | <input type="checkbox"/> | <input type="checkbox"/> |

## TECHNOLOGIES AND DATA COLLECTION

---

21. Does your clinic offer telemedicine-based direct services to patients?

- Yes  
 No

22. Which type(s) of format do you use to collect information in your clinic?

*Tick the appropriate boxes*

- Paper  
 Electronic → *If yes, go to question 22.1*  
 Online → *If yes, go to question 22.1*

22.1 Which technologie(s) do you use to gather data on your patients?

*Tick the appropriate boxes*

- Laptops/tablets (Apple iPad, Samsung Galaxy, Google Chromebook, etc.)  
 Smartphones (iOS, Android, etc.)  
 Personal computers (Excel, etc.)  
 Other (specify) \_\_\_\_\_

23. What is your electronic data capture system?

*Tick the appropriate box*

- CHOIR  
 Excel spreadsheet  
 Microsoft SQL  
 Oracle  
 REDCap  
 Other (specify) \_\_\_\_\_

24. What type of computer-based system(s) your clinic is linked to?

*Tick the appropriate boxes*

| Computer-based systems                                                        | Yes                      | No                       |
|-------------------------------------------------------------------------------|--------------------------|--------------------------|
| Electronic medical records<br>(e.g., <i>Allscripts, Cerner, EPIC</i> )        | <input type="checkbox"/> | <input type="checkbox"/> |
| Clinical e-referral form<br>(e.g., <i>ARM system</i> )                        | <input type="checkbox"/> | <input type="checkbox"/> |
| Electronic/online medical dictionary<br>(e.g., <i>MedlinePlus, Stedmans</i> ) | <input type="checkbox"/> | <input type="checkbox"/> |
| Medico-administrative database                                                | <input type="checkbox"/> | <input type="checkbox"/> |
| Other (specify) _____                                                         |                          |                          |



## POPULATION AND PATIENT TRIAGE

---

25. What type of patient populations do you treat in your pain clinic?

*Tick the box that applies*

- Adults  
 Children  
 Adults and children

26. Do referred patients need to meet precise criteria regarding the duration of their pain experience?

- Yes  No

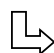

*If yes, tick the box that applies to the duration of pain*

- Pain must have been present for 3 months or more  
 Pain must have been present for 6 months or more  
 Other (specify) \_\_\_\_\_

27. Do you exclude patients who suffer from a specific pain syndrome (e.g., migraine, fibromyalgia, etc.)?

- Yes → *If yes, please specify the pain syndrome* \_\_\_\_\_  
 No

28. Do you have any other exclusion criteria?

- Yes  No

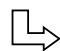

*If yes, tick the boxes that apply to the exclusion criteria*

- Patient who has any major active psychiatric disorder  
 Patient who has a litigation in progress  
 Patient who has a substance abuse disorder  
 Other (specify) \_\_\_\_\_  
 Other (specify) \_\_\_\_\_

29. Does your clinic accept direct referral from the local emergency department?

- Yes  
 No  
 Not applicable

30. Does your clinic use a priority classification system for urgency of patient scheduling in order to expedite certain types of referrals?

- Yes  No

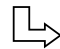

*If yes, please specify the type(s) of referrals by order of priority from 1 to 5 (1 being most important and 5 being least important)*

Priority 1 (specify) \_\_\_\_\_

Priority 2 (specify) \_\_\_\_\_

Priority 3 (specify) \_\_\_\_\_

Priority 4 (specify) \_\_\_\_\_

Priority 5 (specify) \_\_\_\_\_

## STAFF COMPOSITION AND AVAILABILITY

### **Medical specialties integrated within your pain clinic**

31. Please indicate the number of physicians (excluding residents and fellows) who are actively working in your pain clinic.  
*Indicate if they are working 4-5 days/week, 2-3 days/week, or 1 or less day/week*

| Medical specialties                  | <i>Number of physicians working 4-5 days/week</i> | <i>Number of physicians working 2-3 days/week</i> | <i>Number of physicians working 1 or less day/week</i> |
|--------------------------------------|---------------------------------------------------|---------------------------------------------------|--------------------------------------------------------|
| Anesthesiology                       | _____                                             | _____                                             | _____                                                  |
| Neurology                            | _____                                             | _____                                             | _____                                                  |
| Rheumatology                         | _____                                             | _____                                             | _____                                                  |
| Physical medicine and rehabilitation | _____                                             | _____                                             | _____                                                  |
| Family medicine                      | _____                                             | _____                                             | _____                                                  |
| Gynaecology                          | _____                                             | _____                                             | _____                                                  |
| Gastroenterology                     | _____                                             | _____                                             | _____                                                  |
| Orthopaedic surgery                  | _____                                             | _____                                             | _____                                                  |
| Internal medicine                    | _____                                             | _____                                             | _____                                                  |
| Psychiatry                           | _____                                             | _____                                             | _____                                                  |
| Addiction medicine                   | _____                                             | _____                                             | _____                                                  |
| Other (specify)                      | _____                                             | _____                                             | _____                                                  |
| _____                                | _____                                             | _____                                             | _____                                                  |
| _____                                | _____                                             | _____                                             | _____                                                  |
| _____                                | _____                                             | _____                                             | _____                                                  |

**Experience and training of physicians**

31.1 How many years of experience in pain management do the physicians in your clinic have?

*Please indicate the number of physicians in each of the following categories*

<5 years: \_\_\_\_\_ 5-10 years: \_\_\_\_\_ >10 years: \_\_\_\_\_

31.2 How many physicians in your pain clinic have advanced fellowship training in pain management greater than 3 months? \_\_\_\_\_

31.3 How many physicians in your clinic are accredited for pain management from national credentialing bodies?

Royal College of Physicians and Surgeons of Canada (RCPSC)  
in Pain Medicine subspecialty \_\_\_\_\_

American Board of Pain Medicine \_\_\_\_\_

Royal College in Pain Medicine in United Kingdom \_\_\_\_\_

Royal College in Pain Medicine in Australia \_\_\_\_\_

Other (specify) \_\_\_\_\_

31.4 How many physicians with credentials in pain medicine from a national society do you have in your pain clinic?

Canadian Academy of Pain Medicine (CAPM) \_\_\_\_\_

Diplomate of the American Academy of Pain Management (DAAPM) \_\_\_\_\_

Diplomate of the American Board of Pain Medicine (DABPM) \_\_\_\_\_

European Pain Federation (EFIC) \_\_\_\_\_

Other (specify) \_\_\_\_\_

**Medical residents and fellows integrated within your pain clinic**

32. Please indicate the number of medical residents and fellows in your clinic per year.

| Medical specialties                  | <i>Number of residents per year</i> | <i>Number of fellows per year</i> |
|--------------------------------------|-------------------------------------|-----------------------------------|
| Anesthesiology                       | _____                               | _____                             |
| Neurology                            | _____                               | _____                             |
| Rheumatology                         | _____                               | _____                             |
| Physical medicine and rehabilitation | _____                               | _____                             |
| Family medicine                      | _____                               | _____                             |
| Gynaecology                          | _____                               | _____                             |
| Gastroenterology                     | _____                               | _____                             |
| Orthopaedic surgery                  | _____                               | _____                             |
| Internal medicine                    | _____                               | _____                             |
| Psychiatry                           | _____                               | _____                             |
| Addiction medicine                   | _____                               | _____                             |
| Other (specify)                      | _____                               | _____                             |
| _____                                | _____                               | _____                             |
| _____                                | _____                               | _____                             |
| _____                                | _____                               | _____                             |

**Nursing**

33. Are there nursing services in your clinic?

*Please tick the box that applies*

- Available and integrated within your pain clinic → Please go to question 33.1
- Available in your institution, but not integrated within your pain clinic → Please go to question 34
- Not available → Please go to question 34

33.1 Please indicate the number of nurses who are actively working in your pain clinic (excluding trainees).

*Indicate if they are working 4-5 days/week, 2-3 days/week, or 1 or less day/week (excluding nursing time devoted to research activities)*

| Nursing specialties        | <i>Number of<br/>nurses working<br/>4-5<br/>days/week</i> | <i>Number of<br/>nurses working<br/>2-3<br/>days/week</i> | <i>Number<br/>of nurses<br/>working<br/>1 or less<br/>day/week</i> |
|----------------------------|-----------------------------------------------------------|-----------------------------------------------------------|--------------------------------------------------------------------|
| Assistant nurses           | _____                                                     | _____                                                     | _____                                                              |
| Registered nurses          | _____                                                     | _____                                                     | _____                                                              |
| Nurse practitioners        | _____                                                     | _____                                                     | _____                                                              |
| Clinical nurse specialists | _____                                                     | _____                                                     | _____                                                              |

**Nursing subspecialties**

33.1.1 Are there nursing subspecialties within your clinic?

- Yes  No

*If yes → Please specify the type and number of specialized nurse(s)**(e.g., pain management, anesthetist, orthopaedic, mental health, occupational health, dietetic, etc.)*

| Specialized nurses<br>(specify the type) | <i>Number (#)</i> |
|------------------------------------------|-------------------|
| _____                                    | _____             |
| _____                                    | _____             |
| _____                                    | _____             |
| _____                                    | _____             |
| _____                                    | _____             |

**Psychology**

34. Are there services of a psychologist?

*Please tick the box that applies*

- Available and integrated within your pain clinic → Please go question 34.1
- Available in your institution but not integrated within your pain clinic → Please go to question 35
- Not available → Please go to question 35

34.1 Please indicate the number of psychologists who are actively working in your pain clinic (excluding trainees).

*Indicate if they are working 4-5 days/week, 2-3 days/week, or 1 or less day/week*

|               | <i>Number of<br/>psychologists<br/>working 4-5<br/>days/week</i> | <i>Number of<br/>psychologists<br/>working 2-3<br/>days/week</i> | <i>Number of<br/>psychologists<br/>working 1 or less<br/>day/week</i> |
|---------------|------------------------------------------------------------------|------------------------------------------------------------------|-----------------------------------------------------------------------|
| Psychologists | _____                                                            | _____                                                            | _____                                                                 |

**Social work**

35. Are there services of a social worker?

*Please tick the box that applies*

- Available and integrated within your pain clinic → Please go to question 35.1
- Available in your institution, but not integrated within your pain clinic → Please go to question 36
- Not available → Please go to question 36

35.1 Please indicate the number of social workers who are actively working in your pain clinic (excluding trainees).

*Indicate if they are working 4-5 days/week, 2-3 days/week, or 1 or less day/week*

|                | <i>Number of<br/>social workers<br/>working<br/>4-5 days/week</i> | <i>Number of<br/>social workers<br/>working<br/>2-3 days/week</i> | <i>Number of<br/>social workers<br/>working<br/>1 or less day/week</i> |
|----------------|-------------------------------------------------------------------|-------------------------------------------------------------------|------------------------------------------------------------------------|
| Social workers | _____                                                             | _____                                                             | _____                                                                  |

**Sex therapy**

36. Are there services of a sex therapist?

*Please tick the box that applies*

- Available and integrated within your pain clinic → Please go to question 36.1
- Available in your institution, but not integrated within your pain clinic → Please go to question 37
- Not available → Please go to question 37

36.1 Please indicate the number of sex therapists who are actively working in your pain clinic (excluding trainees).

*Indicate if they are working 4-5 days/week, 2-3 days/week, or 1 or less day/week*

|                | <i>Number of<br/>sex therapists<br/>working<br/>4-5 days/week</i> | <i>Number of<br/>sex therapists<br/>working<br/>2-3 days/week</i> | <i>Number of<br/>sex therapists<br/>working<br/>1 or less day/week</i> |
|----------------|-------------------------------------------------------------------|-------------------------------------------------------------------|------------------------------------------------------------------------|
| Sex therapists | _____                                                             | _____                                                             | _____                                                                  |

**Mental health counselling or psychotherapy services**

37. Are there services of a therapist in mental health counselling or psychotherapy?

*Please tick the box that applies*

- Available and integrated within your pain clinic → Please go to question 37.1
- Available in your institution, but not integrated within your pain clinic → Please go to question 38
- Not available → Please go to question 38

37.1 Please indicate the type(s) and number of therapists who are actively working in your pain clinic (excluding trainees).

*Indicate if they are working 4-5 days/week, 2-3 days/week, or 1 or less day/week*

| <i>Therapists<br/>(specify the type)</i> | <i>Number of<br/>therapists<br/>working<br/>4-5 days/week</i> | <i>Number of<br/>therapists<br/>working<br/>2-3 days/week</i> | <i>Number of<br/>therapists<br/>working<br/>1 or less day/week</i> |
|------------------------------------------|---------------------------------------------------------------|---------------------------------------------------------------|--------------------------------------------------------------------|
| _____                                    | _____                                                         | _____                                                         | _____                                                              |
| _____                                    | _____                                                         | _____                                                         | _____                                                              |
| _____                                    | _____                                                         | _____                                                         | _____                                                              |

**Physiotherapy**

38. Are there services of a physiotherapist?

*Please tick the box that applies*

- Available and integrated within your pain clinic → Please go to question 38.1
- Available in your institution, but not integrated within your pain clinic → Please go to question 39
- Not available → Please go to question 39

38.1 Please indicate the number of physiotherapists who are actively working in your pain clinic (excluding trainees).

*Indicate if they are working 4-5 days/week, 2-3 days/week, or 1 or less day/week*

|                  | <i>Number of<br/>physiotherapists<br/>working<br/>4-5 days/week</i> | <i>Number of<br/>physiotherapists<br/>working<br/>2-3 days/week</i> | <i>Number of<br/>physiotherapists<br/>working<br/>1 or less day/week</i> |
|------------------|---------------------------------------------------------------------|---------------------------------------------------------------------|--------------------------------------------------------------------------|
| Physiotherapists | _____                                                               | _____                                                               | _____                                                                    |

**Kinesiology**

39. Are there services of a kinesiologist?

*Please tick the box that applies*

- Available and integrated within your pain clinic → Please go to question 39.1
- Available in your institution, but not integrated within your pain clinic → Please go to question 40
- Not available → Please go to question 40

39.1 Please indicate the number of kinesiologists who are actively working in your pain clinic (excluding trainees).

*Indicate if they are working 4-5 days/week, 2-3 days/week, or 1 or less day/week*

|                | <i>Number of<br/>kinesiologists<br/>working 4-5<br/>days/week</i> | <i>Number of<br/>kinesiologists<br/>working 2-3<br/>days/week</i> | <i>Number of<br/>kinesiologists<br/>working<br/>1 or less day/week</i> |
|----------------|-------------------------------------------------------------------|-------------------------------------------------------------------|------------------------------------------------------------------------|
| Kinesiologists | _____                                                             | _____                                                             | _____                                                                  |



**Occupational therapy**

40. Are there services of an occupational therapist?

*Please tick the box that applies*

- Available and integrated within your pain clinic → Please go to question 40.1
- Available in your institution, but not integrated within your pain clinic → Please go to question 41
- Not available → Please go to question 41

40.1 Please indicate the number of occupational therapists who are actively working in your pain clinic (excluding trainees).

*Indicate if they are working 4-5 days/week, 2-3 days/week, or 1 or less day/week*

|                         | <i>Number of<br/>occupational<br/>therapists<br/>working<br/>4-5 days/week</i> | <i>Number of<br/>occupational<br/>therapists<br/>working<br/>2-3 days/week</i> | <i>Number of<br/>occupational<br/>therapists<br/>working<br/>1 or less day/week</i> |
|-------------------------|--------------------------------------------------------------------------------|--------------------------------------------------------------------------------|-------------------------------------------------------------------------------------|
| Occupational therapists | _____                                                                          | _____                                                                          | _____                                                                               |

**Chiropractic**

41. Are there services of a chiropractor?

*Please tick the box that applies*

- Available and integrated within your pain clinic → Please go to question 41.1
- Available in your institution, but not integrated within your pain clinic → Please go to question 42
- Not available → Please go to question 42

41.1 Please indicate the number of chiropractors who are actively working in your pain clinic (excluding trainees).

*Indicate if they are working 4-5 days/week, 2-3 days/week, or 1 or less day/week*

|               | <i>Number of<br/>chiropractors<br/>working<br/>4-5 days/week</i> | <i>Number of<br/>chiropractors<br/>working<br/>2-3 days/week</i> | <i>Number of<br/>chiropractors<br/>working<br/>1 or less day/week</i> |
|---------------|------------------------------------------------------------------|------------------------------------------------------------------|-----------------------------------------------------------------------|
| Chiropractors | _____                                                            | _____                                                            | _____                                                                 |

**Acupuncture**

42. Are there services of an acupuncturist?

*Please tick the box that applies*

- Available and integrated within your pain clinic → Please go to question 42.1
- Available in your institution, but not integrated within your pain clinic → Please go to question 43
- Not available → Please go to question 43

42.1 Please indicate the number of acupuncturists who are actively working in your pain clinic (excluding trainees).

*Indicate if they are working 4-5 days/week, 2-3 days/week, or 1 or less day/week*

|                | <i>Number of<br/>acupuncturists<br/>working<br/>4-5 days/week</i> | <i>Number of<br/>acupuncturists<br/>working<br/>2-3 days/week</i> | <i>Number of<br/>acupuncturists<br/>working<br/>1 or less day/week</i> |
|----------------|-------------------------------------------------------------------|-------------------------------------------------------------------|------------------------------------------------------------------------|
| Acupuncturists | _____                                                             | _____                                                             | _____                                                                  |

**Pharmacy**

43. Are there services of a pharmacist?

*Please tick the box that applies*

- Available and integrated within your pain clinic → Please go to question 43.1
- Available in your institution, but not integrated within your pain clinic → Please go to question 44
- Not available → Please go to question 44

43.1 Please indicate the number of pharmacists who are actively working in your pain clinic (excluding trainees).

*Indicate if they are working 4-5 days/week, 2-3 days/week, or 1 or less day/week*

|             | <i>Number of<br/>pharmacists<br/>working 4-5<br/>days/week</i> | <i>Number of<br/>pharmacists<br/>working 2-3<br/>days/week</i> | <i>Number of<br/>pharmacists<br/>working<br/>1 or less day/week</i> |
|-------------|----------------------------------------------------------------|----------------------------------------------------------------|---------------------------------------------------------------------|
| Pharmacists | _____                                                          | _____                                                          | _____                                                               |

**Dietetic**

44. Are there services of a dietician?

*Please tick the box that applies*

- Available and integrated within your pain clinic → Please go to question 44.1
- Available in your institution, but not integrated within your pain clinic → Please go to question 45
- Not available → Please go to question 45

44.1 Please indicate the number of dieticians who are actively working in your pain clinic (excluding trainees).

*Indicate if they are working 4-5 days/week, 2-3 days/week, or 1 or less day/week*

|            | <i>Number of<br/>dieticians<br/>working<br/>4-5 days/week</i> | <i>Number of<br/>dieticians<br/>working<br/>2-3 days/week</i> | <i>Number of<br/>dieticians<br/>working<br/>1 or less day/week</i> |
|------------|---------------------------------------------------------------|---------------------------------------------------------------|--------------------------------------------------------------------|
| Dieticians | _____                                                         | _____                                                         | _____                                                              |

**Dentistry**

45. Are there services of a dentist?

*Please tick the box that applies*

- Available and integrated within your pain clinic → Please go to questions 45.1 and 45.2
- Available in your institution, but not integrated within your pain clinic → Please go to question 46
- Not available → Please go to question 46

45.1 Please indicate the number of dentists who are actively working in your pain clinic (excluding trainees).

*Indicate if they are working 4-5 days/week, 2-3 days/week, or 1 or less day/week*

|          | <i>Number of<br/>dentists<br/>working<br/>4-5 days/week</i> | <i>Number of<br/>dentists<br/>working<br/>2-3 days/week</i> | <i>Number of<br/>dentists<br/>working<br/>1 or less day/week</i> |
|----------|-------------------------------------------------------------|-------------------------------------------------------------|------------------------------------------------------------------|
| Dentists | _____                                                       | _____                                                       | _____                                                            |

45.2 If these services are integrated within your pain clinic, please indicate which service(s) are provided by the dentist.

*You can tick MORE than ONE box*

- Patient evaluation/assessment
- Dentistry treatment
- Temporomandibular joint disorder treatment
- Other (specify) \_\_\_\_\_

**Other healthcare professionals**

46. Are there services of other types of health professionals available and integrated within your pain clinic?

- Yes → Please go to question 46.1  
 No → Please go to question 47

46.1 Please indicate the type(s) and number of healthcare professionals who are actively working in your pain clinic (excluding trainees).

*Indicate if they are working 4-5 days/week, 2-3 days/week, or 1 or less day/week*

| Healthcare professionals<br>(specify the type) | Number working<br>4-5 days/week | Number working<br>2-3 days/week | Number working<br>1 or less day/week |
|------------------------------------------------|---------------------------------|---------------------------------|--------------------------------------|
| _____                                          | _____                           | _____                           | _____                                |
| _____                                          | _____                           | _____                           | _____                                |
| _____                                          | _____                           | _____                           | _____                                |

**Office support and administrative staff**

47. Are there services of a secretary/receptionist/manager/coordinator/administrator:

*Please tick the box that applies*

- Available and integrated within your pain clinic? → Please go to questions 47.1 and 47.2  
 Available in your institution, but not integrated within your pain clinic? → Please go to question 48  
 Not available? → Please go to question 48

47.1 Do you have office support staff in your clinic?

- Yes  No

*If yes → Please indicate the number for each position of the following full time equivalent (FTE)*

Secretary(ies) \_\_\_\_\_  
 Receptionist(s) \_\_\_\_\_

47.2 Do you have administrative staff in your clinic?

- Yes  No

*If yes → Please indicate the number for each position of the following full time equivalent (FTE)*

Manager(s) \_\_\_\_\_  
 Administrator coordinator(s) \_\_\_\_\_  
 Medical administrator(s) \_\_\_\_\_  
 Other (specify) \_\_\_\_\_  
 Other (specify) \_\_\_\_\_

## PAIN MANAGEMENT PROGRAMS

---

48. Does your pain clinic offer specific pain management programs (e.g., low back school)?

Yes → Please fill out the following table

No → Please go to question 49

| Pain management program(s)  | Pain management program(s) offered on which basis? |                             | Duration of program in weeks | Total number of visits (if applicable) |
|-----------------------------|----------------------------------------------------|-----------------------------|------------------------------|----------------------------------------|
|                             | Outpatient                                         | Inpatient (Hospitalization) |                              |                                        |
| Name of program 1:<br>_____ | <input type="checkbox"/>                           | <input type="checkbox"/>    | _____                        | _____                                  |
| Name of program 2:<br>_____ | <input type="checkbox"/>                           | <input type="checkbox"/>    | _____                        | _____                                  |
| Name of program 3:<br>_____ | <input type="checkbox"/>                           | <input type="checkbox"/>    | _____                        | _____                                  |
| Name of program 4:<br>_____ | <input type="checkbox"/>                           | <input type="checkbox"/>    | _____                        | _____                                  |
| Name of program 5:<br>_____ | <input type="checkbox"/>                           | <input type="checkbox"/>    | _____                        | _____                                  |

## TEACHING ACTIVITIES

---

49. Is your clinic a training site for the Pain Medicine Residency of the Royal College of Physicians and Surgeons of Canada (RCPSC)?

Yes

No

### **Student training**

50. Is your clinic a site specialized for student training on pain (excluding medical specialties)?

Yes  No

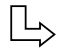

*If yes, in which discipline(s) and how many students per year?*

| Professional disciplines | <i>Number<br/>per year</i> |
|--------------------------|----------------------------|
| Nursing                  | _____                      |
| Psychology               | _____                      |
| Social work              | _____                      |
| Sex therapy              | _____                      |
| Physiotherapy            | _____                      |
| Kinesiology              | _____                      |
| Occupational therapy     | _____                      |
| Pharmacy                 | _____                      |
| Dietetic                 | _____                      |
| Dentistry                | _____                      |
| Other (specify)<br>_____ | _____                      |
| Other (specify)<br>_____ | _____                      |
| Other (specify)<br>_____ | _____                      |

## RESEARCH ACTIVITIES

---

51. Do you have research activities in your pain clinic?

- Yes → Please answer the questions 48.1 to 48.7  
 No → Please go to question 49

51.1 In how many studies your pain clinic has been involved in the past 12 months?

Randomized control trial (RCT) \_\_\_\_\_  
 Pragmatic RCT \_\_\_\_\_  
 Longitudinal observational studies \_\_\_\_\_  
 Cross-sectional studies \_\_\_\_\_  
 Other (specify) \_\_\_\_\_

51.2 Please indicate the source(s) of funding for research in your pain clinic in the past 12 months?

*You can tick MORE than ONE box*

- US National Institutes of Health  
 Canadian Institutes of Health Research  
 Health Canada  
 Provincial funding agency with a peer-reviewed committee  
 Provincial funding agency without a peer-reviewed committee  
 Pharmaceutical industry  
 Biotech industry  
 Private foundation/donations  
 Self-funded  
 Other (specify) \_\_\_\_\_

51.3 Do you have an assigned research coordinator and/or a research nurse?

- Yes  No

*If yes → Please indicate the number for each position of the following full time equivalent (FTE)*

Research coordinator \_\_\_\_\_  
 Research nurse \_\_\_\_\_

51.4 Does your clinic offer research fellowships?

- Yes  No

51.5 Do you have designated space for research activity in your pain clinic?

- Yes  No

51.6 Do you collect outcome data from your pain clinic?

- Yes  No

 *If yes → Please indicate if you enter your data into an electronic database*

- Yes  No

51.7 Would you like to be involved in multicentre clinical research on pain?

- Yes  No

## ADMINISTRATIVE DATA AND FUNDING

---

52. How are the costs of the services offered to the patients by your clinic covered?

*You can tick MORE than ONE box*

- Government public system (e.g., hospital budget)
- Compensation agencies (e.g., worker's compensation board)
- Private insurance
- Patient contribution (out of pocket)
- Philanthropic donations
- Other (specify) \_\_\_\_\_

52.1 What is the major source of funding (>50%) of your clinic?

*Please tick the box that applies*

- Public provincial
- Private funding

## SPACE AND FACILITIES

---

53. What type(s) of facilities are available in your clinic?

*Please tick the appropriate boxes and provide the number of rooms*

| Clinic facilities                             | Yes                      | No                       | Number of room(s) |
|-----------------------------------------------|--------------------------|--------------------------|-------------------|
| Outpatient consulting                         | <input type="checkbox"/> | <input type="checkbox"/> | _____             |
| Treatment room                                | <input type="checkbox"/> | <input type="checkbox"/> | _____             |
| Recovery room                                 | <input type="checkbox"/> | <input type="checkbox"/> | _____             |
| Waiting area                                  | <input type="checkbox"/> | <input type="checkbox"/> | _____             |
| Clinical staff office                         | <input type="checkbox"/> | <input type="checkbox"/> | _____             |
| Conference/meeting room                       | <input type="checkbox"/> | <input type="checkbox"/> | _____             |
| Operating theatre                             | <input type="checkbox"/> | <input type="checkbox"/> | _____             |
| Fluoroscopy/X-Ray room                        | <input type="checkbox"/> | <input type="checkbox"/> | _____             |
| Advanced medical imaging (e.g., CT Scan, MRI) | <input type="checkbox"/> | <input type="checkbox"/> | _____             |
| Other (specify)<br>_____                      | <input type="checkbox"/> | <input type="checkbox"/> | _____             |



## HISTORY AND FUTURE OF THE CLINIC

---

54. How long has your clinic been open for?

*Year of inauguration:* \_\_\_\_\_

55. Do you anticipate any change in the next 24 months in the activities of your clinic?

| Clinic activities        | Yes<br><i>Increase</i>   | Yes<br><i>Decrease</i>   | No                       |
|--------------------------|--------------------------|--------------------------|--------------------------|
| Personnel                | <input type="checkbox"/> | <input type="checkbox"/> | <input type="checkbox"/> |
| Teaching                 | <input type="checkbox"/> | <input type="checkbox"/> | <input type="checkbox"/> |
| Research funding         | <input type="checkbox"/> | <input type="checkbox"/> | <input type="checkbox"/> |
| Operating budget         | <input type="checkbox"/> | <input type="checkbox"/> | <input type="checkbox"/> |
| Space                    | <input type="checkbox"/> | <input type="checkbox"/> | <input type="checkbox"/> |
| Other (specify)<br>_____ | <input type="checkbox"/> | <input type="checkbox"/> | <input type="checkbox"/> |

56. Can you identify any factors that would help your clinic to treat chronic pain more effectively?

| Factors                     | Yes                      | No                       |
|-----------------------------|--------------------------|--------------------------|
| More funding                | <input type="checkbox"/> | <input type="checkbox"/> |
| More staff                  | <input type="checkbox"/> | <input type="checkbox"/> |
| More leading-edge expertise | <input type="checkbox"/> | <input type="checkbox"/> |
| More space                  | <input type="checkbox"/> | <input type="checkbox"/> |
| Other (specify)<br>_____    | <input type="checkbox"/> | <input type="checkbox"/> |
| Other (specify)<br>_____    | <input type="checkbox"/> | <input type="checkbox"/> |
| Other (specify)<br>_____    | <input type="checkbox"/> | <input type="checkbox"/> |

57. Among the above choices suggested in question 56, can you identify the top two priorities for improving the clinic services?

*Please list them by order of priority*

1. \_\_\_\_\_

2. \_\_\_\_\_

58. Can you identify any factor(s) that might compromise the functioning of the clinic in the next 12 or 24 months?

\_\_\_\_\_  
\_\_\_\_\_  
\_\_\_\_\_  
\_\_\_\_\_

**Comments/Suggestions**

59. Please feel free to provide further information about your multidisciplinary pain treatment clinic

\_\_\_\_\_  
\_\_\_\_\_  
\_\_\_\_\_  
\_\_\_\_\_

**THANK YOU VERY MUCH FOR TAKING YOUR TIME TO ANSWER THIS QUESTIONNAIRE!**
